# Supplementary material
Source: Frontiers journal article supplement (https://www.frontiersin.org/articles/211684)
Supplement: Table_1.XLSX [file Table_1.XLSX]

## Sheet: plagioclase
Analysis #	SiO2	TiO2	Al2O3	Cr2O3	FeO	MnO	MgO	CaO	Na2O	K2O	Total		An#
Sample: Mangatawai 407-28
No28-1	53.339	0	29.391	0	0.798	0	0.119	12.909	4.047	0.151	100.754		63.2449
No28-2	48.881	0.003	32.703	0.008	0.643	0	0.086	16.614	2.068	0.053	101.059		81.3662
No28-3	48.265	0.021	32.555	0	0.667	0	0.072	16.669	1.931	0.028	100.208		82.5356
No28-4	47.806	0.051	32.647	0.027	0.644	0	0.093	16.736	1.956	0.072	100.032		82.1973
No28-5	47.411	0	32.755	0	0.579	0.022	0.074	17.167	1.739	0.024	99.771		84.3919
No28-6	49.057	0	31.514	0	0.753	0	0.099	15.995	2.334	0.053	99.805		78.8667
No28-7	51.592	0.033	30.176	0	0.8	0.056	0.086	14.061	3.321	0.147	100.272		69.4549
No28-10	51.053	0.031	29.645	0.004	0.761	0.06	0.097	13.836	3.41	0.143	99.04		68.5763
No28-11	48.486	0	31.904	0	0.637	0	0.119	16.074	2.29	0.07	99.58		79.1795
No28-12	49.021	0.048	31.324	0.008	0.734	0.029	0.085	15.506	2.555	0.108	99.418		76.5448
No28-14	49.763	0.061	31.302	0	0.655	0.022	0.134	15.019	2.447	0.108	99.511		76.7254
No28-16	48.594	0.007	32.454	0	0.706	0.047	0.064	16.344	1.996	0.046	100.258		81.6784
No28-17	49.849	0.043	31.151	0.038	0.552	0.002	0.063	15	2.589	0.105	99.392		75.7218
No28-18	49.508	0	31.334	0	0.713	0.029	0.117	15.61	2.57	0.05	99.931		76.8228
No28-24	49.744	0.042	30.693	0	0.778	0.03	0.102	14.915	2.704	0.141	99.149		74.6672
No28-25	47.658	0.024	32.742	0	0.676	0	0.048	16.818	1.839	0.04	99.845		83.2864
No28-26	47.821	0.014	32.557	0	0.647	0	0.057	16.843	1.874	0.059	99.872		82.9544
No28-27	49.191	0.006	31.249	0	0.723	0.06	0.122	15.363	2.497	0.12	99.331		76.7238
No28-32	51.562	0.054	29.996	0	0.818	0	0.128	13.941	3.402	0.155	100.056		68.7396
No28-33	52.856	0.05	29.209	0	0.953	0	0.127	13.092	3.788	0.177	100.252		64.9519
No28-37	47.914	0.019	32.267	0	0.549	0.015	0.072	16.424	1.999	0.052	99.311		81.7003
No28-38	48.437	0.032	31.806	0	0.602	0.019	0.131	15.754	2.279	0.049	99.109		79.0237
No28-40	48.029	0.007	32.276	0	0.653	0.001	0.061	16.246	2.127	0.063	99.463		80.5476
No28-42	50.211	0.023	30.429	0	0.824	0.012	0.137	14.468	2.964	0.139	99.207		72.3532
No28-43	50.2	0.041	30.235	0.023	0.773	0.041	0.107	14.36	3.106	0.152	99.038		71.2275
No28-44	50.815	0.034	29.879	0.033	0.914	0	0.13	14.045	3.275	0.126	99.251		69.8042
No28-51	51.009	0.02	30.466	0.007	0.683	0.017	0.097	14.308	3.215	0.127	99.949		70.5655
No28-52	48.777	0.042	32.042	0	0.726	0.001	0.072	15.787	2.215	0.068	99.73		79.429
No28-53	50.36	0	30.563	0.049	0.656	0.026	0.115	14.623	2.954	0.126	99.472		72.687
No28-54	54.582	0.017	27.751	0	0.715	0.024	0.128	11.63	4.554	0.23	99.631		57.7357
No28-55	52.128	0.054	30.698	0.024	0.587	0.019	0.09	14.276	3.433	0.134	101.443		69.1434
No28-56	51.671	0.083	29.417	0	0.773	0	0.135	13.404	3.493	0.161	99.137		67.3038
No28-57	48.449	0.006	32.099	0	0.748	0.009	0.103	16.154	2.195	0.082	99.845		79.8789
No28-58	47.593	0.003	32.542	0.016	0.611	0	0.093	16.485	1.929	0.052	99.324		82.2724
No28-59	52.954	0	29.028	0.009	0.578	0.011	0.121	12.811	4.024	0.157	99.693		63.1748
No28-60	50.347	0.054	30.946	0.043	0.636	0	0.094	15.055	2.813	0.099	100.087		74.2998
No28-61	48.367	0.05	31.766	0	0.693	0	0.074	15.664	2.313	0.072	98.999		78.5766
No28-62	51.879	0.039	29.613	0.009	0.761	0.022	0.113	13.501	3.571	0.135	99.643		67.0929
No28-63	52.417	0.037	29.271	0	0.749	0.009	0.104	13.142	3.549	0.152	99.43		66.5611
No28-64	47.509	0.044	32.558	0	0.667	0.027	0.076	16.594	1.885	0.045	99.405		82.7294
No28-65	52.629	0.036	29.212	0	0.715	0	0.135	12.765	3.898	0.175	99.565		63.7418
No28-67	48.214	0	32.036	0	0.691	0	0.09	16.307	2.065	0.071	99.474		81.0173
No28-70	52.284	0.048	29.033	0	0.74	0	0.127	12.849	3.798	0.163	99.042		64.5196
Sample: Papakai 606-30
No30-4	52.65	0.061	28.764	0	0.984	0.014	0.107	12.739	3.971	0.253	99.543		62.9862
No30-6	49.239	0.044	31.352	0.021	0.757	0	0.061	15.615	2.663	0.129	99.881		75.8495
No30-8	52.209	0.053	29.667	0	0.455	0	0.01	12.952	4.011	0.241	99.598		63.1924
No30-10	49.539	0.036	31.226	0	0.724	0	0.07	15.197	2.754	0.112	99.658		74.8133
No30-11	50.966	0	30.337	0	0.585	0	0.12	14.167	3.245	0.139	99.559		70.1206
No30-12	49.925	0.027	30.903	0	0.629	0.01	0.07	15.005	2.855	0.117	99.541		73.8801
No30-13	49.947	0.032	31.137	0.006	0.598	0	0.104	15.007	2.866	0.099	99.796		73.8883
No30-14	47.87	0.008	32.653	0	0.51	0.037	0.095	16.131	2.207	0.056	99.567		79.8926
No30-16	48.177	0.106	32.649	0.027	0.689	0	0.073	15.983	2.138	0.05	99.892		80.2727
No30-17	49.114	0.043	31.303	0.09	0.68	0.004	0.078	15.555	2.52	0.066	99.453		77.0313
No30-18	47.181	0.012	32.796	0.036	0.666	0.057	0.087	16.912	1.719	0.07	99.536		84.116
No30-19	47.461	0.024	32.827	0.007	0.669	0	0.095	17.04	1.797	0.043	99.963		83.7653
No30-20	50.731	0	30.908	0	0.615	0.054	0.123	14.297	3.227	0.122	100.077		70.4947
No30-21	48.447	0.03	32.12	0	0.595	0.017	0.089	16.237	2.249	0.082	99.866		79.5783
No30-26	48.688	0.036	32.069	0.001	0.75	0.034	0.075	16.1	2.336	0.07	100.159		78.8832
No30-27	51.595	0.029	30.037	0	0.609	0.037	0.085	13.881	3.609	0.108	99.99		67.5822
No30-28	52.925	0.072	28.75	0.013	0.562	0.004	0.105	12.789	4.115	0.195	99.53		62.4873
No30-29	50.278	0.053	30.368	0	0.552	0.003	0.077	14.671	3.066	0.095	99.163		72.159
No30-30	49.116	0.033	31.406	0	0.559	0	0.07	15.331	2.677	0.097	99.289		75.5592
No30-38	51.942	0.025	30.049	0	0.66	0	0.091	13.889	3.508	0.153	100.317		68.0224
No30-39	49.213	0.011	31.601	0.017	0.591	0.004	0.104	15.871	2.521	0.068	100.001		77.3694
No30-40	48.602	0.013	31.724	0	0.502	0.049	0.037	15.712	2.403	0.123	99.165		77.7581
No30-45	48.514	0.035	31.656	0	0.684	0.006	0.094	15.562	2.365	0.085	99.001		78.0353
No30-47	51.75	0	30.081	0	0.605	0	0.127	13.98	3.37	0.137	100.05		69.0693
No30-51	48.145	0.017	32.524	0	0.704	0	0.081	16.389	2.161	0.066	100.087		80.4268
No30-63	48.297	0.053	31.611	0	0.956	0.034	0.164	16.56	2.017	0.103	99.795		81.4478
No30-64	48.673	0.07	31.914	0	0.712	0	0.104	15.82	2.434	0.063	99.79		77.9352
No30-71	52.908	0.088	28.743	0	0.981	0	0.095	12.671	4.202	0.195	99.883		61.7918
No30-72	54.941	0.119	27.707	0.01	0.842	0	0.091	11.245	4.828	0.303	100.086		55.2819
No30-73	55.702	0.137	26.887	0.018	1.077	0.019	0.147	10.699	4.806	0.406	99.898		53.8233
No30-74	54.366	0.056	27.79	0.001	0.96	0.009	0.061	11.305	4.678	0.309	99.535		56.1406
No30-86	48.532	0.008	32.24	0	0.735	0	0.077	16.107	2.186	0.024	99.909		80.1712
No30-87	60.815	0.824	17.325	0.028	6.065	0.083	1.957	6.96	3.733	1.286	99.076		45.6531
Sample: Tufa Trig 108-137
No137-8	55.118	0.077	27.615	0	0.971	0	0.121	11.116	4.874	0.375	100.267		54.5406
No137-20	53.012	0.051	28.461	0	0.811	0.032	0.099	12.115	4.432	0.241	99.254		59.3266
No137-21	53.298	0.059	28.727	0	0.786	0	0.11	11.973	4.358	0.268	99.579		59.3395
No137-27	52.996	0.042	28.955	0	0.748	0.012	0.125	12.467	4.086	0.291	99.722		61.6983
No137-28	53.543	0.058	28.57	0	0.642	0	0.093	12.057	4.291	0.344	99.598		59.5984
No137-30	55.629	0.054	27.077	0.001	0.59	0.024	0.104	10.379	5.28	0.345	99.483		51.02
No137-31	53.037	0.048	28.921	0	0.559	0	0.042	12.622	4.187	0.248	99.664		61.592
No137-32	53.77	0.065	28.706	0	0.697	0	0.069	11.792	4.37	0.285	99.754		58.8479
No137-33	54.615	0.095	27.785	0	0.581	0	0.055	11.198	4.814	0.339	99.482		55.1307
No137-34	54.636	0.083	27.749	0	0.633	0	0.062	11.07	4.836	0.37	99.439		54.6385
No137-35	53.679	0.078	28.371	0.008	0.634	0.003	0.061	11.68	4.398	0.275	99.187		58.5029
No137-36	53.292	0.096	28.365	0	0.687	0	0.106	12.142	4.398	0.271	99.357		59.4553
No137-41	52.879	0.095	29.033	0	0.721	0	0.124	12.916	3.993	0.245	100.006		63.2135
No137-45	53.123	0.073	28.051	0	0.832	0	0.146	12.562	4.133	0.276	99.196		61.6735
No137-54	55.745	0.038	26.578	0	0.664	0	0.08	10.529	5.138	0.375	99.147		51.9391
No137-57	53.95	0.029	27.592	0.018	0.728	0.001	0.119	11.943	4.574	0.266	99.22		58.1576
No137-59	53.845	0.062	27.773	0.012	0.779	0	0.132	11.842	4.434	0.299	99.178		58.5642
No137-61	53.803	0.045	27.868	0	0.786	0	0.07	11.976	4.387	0.25	99.185		59.2544
No137-62	53.494	0.035	28.241	0	0.674	0	0.1	12.223	4.435	0.306	99.508		59.3013
No137-64	52.668	0.049	29.067	0	0.74	0.008	0.093	12.76	4.051	0.281	99.717		62.4751
No137-65	52.665	0.065	29.198	0	0.681	0.018	0.089	12.723	4.033	0.293	99.765		62.463
No137-68	53.137	0.046	28.895	0.015	0.943	0	0.083	12.305	4.203	0.247	99.874		60.9047
No137-69	53.374	0.097	27.828	0.015	0.981	0.01	0.18	12.025	4.188	0.317	99.015		60.1855
No137-82	53.091	0.089	28.669	0	0.757	0	0.131	12.418	4.222	0.268	99.645		60.9441
No137-83	54.219	0.019	27.657	0.011	0.753	0.024	0.09	11.583	4.635	0.301	99.292		56.9816
No137-84	51.898	0.03	29.793	0	0.674	0	0.131	13.26	3.786	0.142	99.714		65.3873
No137-85	54.248	0.069	28.158	0.042	0.579	0	0.076	11.471	4.711	0.29	99.644		56.3962
No137-86	53.072	0.027	29.576	0	0.655	0	0.132	13.108	3.943	0.195	100.708		64.0216

## Sheet: orthopyroxene
Analysis #	SiO2	TiO2	Al2O3	Cr2O3	FeO	MnO	MgO	CaO	Na2O	K2O	Total		En#	Fs#	Wo#
Sample: Mangatawai 407-28
No28-20	53.882	0.327	1.522	0	17.397	0.365	25.097	1.848	0	0	100.438		69.3485	26.9801	3.67138
No28-21	53.78	0.32	1.794	0.023	17.052	0.347	25.654	1.802	0.042	0	100.814		70.2465	26.2059	3.54762
No28-45	53.796	0.262	1.749	0.064	16.577	0.38	25.719	1.721	0.029	0	100.297		70.9291	25.6585	3.41243
No28-46	53.012	0.292	2.749	0.015	15.913	0.266	25.858	2.468	0.045	0	100.618		70.7207	24.4263	4.85299
No28-47	53.167	0.215	2.657	0.014	15.432	0.303	26.321	1.92	0.021	0	100.05		72.3848	23.8189	3.79629
No28-48	54.192	0.217	1.045	0.027	16.511	0.309	26.064	1.855	0.024	0	100.244		71.0879	25.2745	3.63757
No28-49	53.777	0.224	1.712	0.104	16.16	0.293	26.232	1.835	0.045	0	100.382		71.6309	24.7665	3.60261
Sample: Papakai 606-30
No30-32	53.979	0.18	1.415	0.029	17.023	0.408	25.847	1.703	0.024	0	100.608		70.571	26.0859	3.34305
No30-33	53.293	0.176	1.96	0.013	18.38	0.275	24.723	1.722	0.058	0	100.6		68.151	28.4361	3.41285
No30-34	53.691	0.196	1.931	0.037	18.089	0.392	24.752	1.785	0.029	0	100.902		68.3988	28.0548	3.54641
No30-35	53.263	0.265	1.701	0.146	17.799	0.369	24.34	1.81	0.04	0	99.733		68.3113	28.0364	3.65227
No30-36	53.596	0.238	1.748	0.078	16.557	0.299	25.856	1.694	0.008	0	100.074		71.0984	25.5525	3.34907
No30-37	53.586	0.187	1.963	0.023	15.769	0.274	26.273	1.861	0.013	0	99.949		72.0572	24.2731	3.66967
No30-41	54.237	0.256	0.641	0	17.545	0.422	24.399	2.27	0.057	0.002	99.829		68.0052	27.4459	4.54892
No30-42	53.296	0.164	1.603	0.035	16.802	0.358	25.711	1.704	0	0	99.673		70.7003	25.9309	3.36887
No30-49	54.019	0.262	1.155	0.005	18.279	0.418	24.074	2.231	0.028	0	100.471		66.9893	28.5472	4.46344
No30-55	52.92	0.299	1.801	0.049	17.851	0.469	24.139	2.082	0.028	0	99.638		67.7021	28.0996	4.19833
No30-56	53.24	0.321	2.091	0	17.015	0.364	25.28	2.154	0.013	0	100.478		69.492	26.2509	4.25712
No30-57	53.415	0.252	2.172	0.104	16.384	0.369	25.61	1.949	0.045	0	100.3		70.7327	25.3971	3.87021
No30-58	53.425	0.283	1.437	0	17.998	0.365	24.431	1.789	0.045	0	99.773		68.2076	28.2014	3.59099
No30-67	54.017	0.252	1.722	0.014	16.166	0.393	26.079	1.725	0	0	100.368		71.6607	24.9314	3.40794
No30-80	53.949	0.196	1.751	0	15.841	0.329	26.03	1.749	0.033	0	99.878		71.9494	24.5748	3.4758
No30-81	53.7	0.262	1.263	0.027	16.312	0.423	26.124	1.806	0.024	0	99.941		71.4209	25.0292	3.5499
No30-82	53.702	0.17	1.882	0.022	15.994	0.343	26.056	1.682	0.014	0	99.865		71.8947	24.7685	3.33678
No30-84	54.271	0.223	1.662	0.075	15.803	0.229	26.322	1.812	0.034	0	100.431		72.1266	24.3036	3.56983
Sample: Tufa Trig 108-137
No137-9	52.564	0.452	1.319	0.021	20.797	0.321	22.76	1.923	0.025	0	100.182		63.5491	32.5906	3.86037
No137-11	53.108	0.289	1.1	0.013	18.513	0.388	24.446	2.069	0.022	0	99.948		67.3	28.6048	4.09525
No137-16	54.35	0.054	1.656	0.485	8.323	0.232	31.869	2.046	0.023	0	99.038		83.8409	12.2891	3.86995
No137-22	54.077	0.195	0.879	0	15.739	0.4	26.416	2.018	0.027	0	99.751		71.9775	24.0692	3.95333
No137-23	53.965	0.171	1.573	0.039	14.063	0.222	28.268	1.6	0	0	99.901		75.7628	21.154	3.08314
No137-24	54.018	0.21	1.724	0.076	14.695	0.309	27.675	1.657	0.006	0	100.37		74.5678	22.2222	3.20995
No137-25	53.892	0.088	1.562	0.033	13.666	0.232	27.841	1.654	0.052	0	99.02		75.8607	20.8991	3.24026
No137-37	52.98	0.315	1.125	0	19.73	0.38	23.329	1.991	0.037	0	99.887		65.1032	30.9021	3.99475
No137-38	52.226	0.352	1.39	0	19.797	0.411	23.277	1.753	0	0	99.206		65.2961	31.1684	3.53553
No137-39	52.939	0.224	1.345	0.039	20.274	0.42	23.387	1.731	0.013	0	100.372		64.9454	31.5986	3.45608
No137-48	52.637	0.302	1.286	0.054	19.639	0.338	23.972	1.855	0.019	0	100.102		65.9876	30.3411	3.67126
No137-49	52.533	0.262	1.148	0	20.346	0.404	23.796	1.807	0.04	0	100.336		65.169	31.273	3.55801
No137-50	52.808	0.231	1.174	0	19.804	0.384	23.603	1.781	0.021	0	99.806		65.5667	30.8762	3.55707
No137-51	52.877	0.233	1.21	0	20.651	0.358	23.72	1.787	0.005	0	100.841		64.8174	31.6718	3.51086
No137-52	52.869	0.35	1.331	0.037	19.904	0.419	23.414	1.872	0.027	0	100.223		65.1638	31.0903	3.74584
No137-55	53.027	0.329	1.076	0.009	19.635	0.506	23.529	2.115	0.039	0	100.265		65.232	30.5522	4.2158
No137-70	53.746	0.314	1.004	0	18.394	0.409	24.567	2.046	0.05	0	100.53		67.563	28.3914	4.04553
No137-81	54.134	0.199	0.749	0.014	18.369	0.333	25.174	1.925	0.033	0	100.93		68.2822	27.9637	3.75404

## Sheet: clinopyroxene
Analysis #	SiO2	TiO2	Al2O3	Cr2O3	FeO	MnO	MgO	CaO	Na2O	K2O	Total		En#	Fs#	Wo#
Sample: Tufa Trig 108-137
No137-4	51.751	0.245	2.006	0.419	7.446	0.177	17.128	19.523	0.319	0	99.014		48.4615	11.8241	39.7145
No137-5	50.944	0.642	2.424	0.113	9.424	0.223	16.36	18.659	0.257	0	99.046		46.6569	15.0842	38.259
No137-7	51.347	0.597	1.936	0.061	10.381	0.229	15.729	18.824	0.201	0	99.305		44.8257	16.6043	38.5701
No137-66	54.073	0.171	1.901	0.111	6.803	0.166	19.423	17.545	0.191	0	100.384		54.1701	10.6487	35.1811
No137-67	51.411	0.485	4.66	0.337	6.35	0.204	16.727	19.945	0.322	0	100.441		48.3009	10.2912	41.4079
No137-75	52.236	0.28	2.673	0.196	7.451	0.162	16.74	20.838	0.272	0	100.848		46.6246	11.6474	41.728
No137-76	52.613	0.308	2.693	0.172	6.874	0.196	16.617	20.734	0.305	0	100.512		46.9643	10.9038	42.1319
No137-77	52.224	0.395	2.684	0.038	7.473	0.21	16.351	20.574	0.302	0	100.251		46.2712	11.869	41.8598

## Sheet: olivine
Analysis #	SiO2	TiO2	Al2O3	Cr2O3	FeO	MnO	MgO	CaO	Na2O	K2O	Total		Fo#
Sample: Tufa Trig 108-137
No137-78	38.61	0.006	0.009	0	24.046	0.292	38.47	0.155	0.022	0	101.61		74.0391
No137-78_2	38.318	0	0.023	0	26.296	0.385	36.96	0.141	0	0	102.123		71.4738
No137-78_3	38.083	0.003	0.043	0	25.098	0.372	38.102	0.135	0.005	0	101.841		73.0186
No137-78_4	38.319	0.009	0	0	23.81	0.292	38.919	0.125	0.001	0	101.475		74.4496
No137-78_5	37.858	0.016	0.051	0	25.08	0.304	37.902	0.15	0.024	0	101.385		72.929
No137-79	37.891	0.003	0.017	0	24.904	0.287	37.927	0.126	0.01	0	101.165		73.0808
No137-80	37.832	0	0.038	0	26.152	0.382	36.39	0.174	0.025	0	100.993		71.2685
